# Supplementary material
Source: PubMed Central journal article supplement (PMC2663752)
Supplement: pp.108.133371_1.pdf [file pp.108.133371_1.pdf]

## Supplementary Figure S1

### Alternative Splicing Studies of the ROS Gene Network in *Populus* Reveal Two Isoforms of High Iso-electric Point Superoxide Dismutase

Vaibhav Srivastava et al.

#### >*hipI-SODC1b*

GATATGATTAATAAAACCTGACAGAGAGCAGAAGCAAGAGTAAGCGCAAAGATAAAATGGCAACAG  
GGTCTGTGAAAGCGGTGGCTCTCATCACCGGAGACTCCAATGTTAGAGGCTCTCTTCATTTTCATT  
CGAGAACCAAACGGGGCCACACATGTGACAGGGAGGATAGCTGGCTTATCACCAGGCCTTCATGG  
GTTTCATATTCATGCTCTTGGTGGTACCACCAATGGCTGCAATTCCTACTGGACCTCATTTCATC  
CATTAAAGAAGGACCATGGAGCTCCATGTGATAATGTACGTCATGCTGGAGATTTGGGGAACATC  
ATTGCAGGCTCAAATGGTGTGTCAGAAAGTTTCGATCAAAGACTTTCAGATAACCACTGAGTGGGAT  
GCATTCATATTGGGGAGGGCTGTTGTTGTACATGCTGATCCTGATGATCTTGGAAAAGGTGGAC  
ATGATCTTAGCAAGACAACCTGGAAATGCAGGTGCAAGGGTTGGATGTGGTAATATCCCTACTCT  
TCTGAATTTTTATGCTTTTCGAGCAAGAACCTTGTAGTCATGAGATGGAATGGAGCATCATTGGGCT  
CAAATCATCTGTTTAGGTTTGATACTTAGTTGATGGATTTCTTCATGCAAGATGTTCTTTTCGGT

#### >*hipI-SODC1s*

AATTCGGCCATTACGGCCGGGGAAGCGCAAAGATAAAATGGCAACAGGGTCTGTGAAAGCGGTGG  
CTCTCATCACCGGAGACTCCAATGTTAGAGGCTCTCTTCATTTTCATTTCGAGAACCAAACGGGGCC  
ACACATGTGACAGGGAGGATAGCTGGCTTATCACCAGGCCTTCATGGGTTTCATATTCATGCTCT  
TGGTGATAACCAATGGCTGCAATTCCTACTGGACCTCATTTCATCCATTAAAGAAGGACCATG  
GAGCTCCATGTGATAATGTACGTCATGCTGGAGATTTGGGGAACATCATTGCAGGCTCAAATGGT  
GTTGCAGAAAGTTTCGATCAAAGACTTTCAGATAACCACTGAGTGGGATGCATTCCATATTGGGGAG  
GGCTGTTGTTGTACATGCTGCTCCTGATGATCTTGGAAAAGGTGGACATGATCTTAGCAAGACAA  
CTGGGAATGCAGGTGCAAGGGTTGGATGTGGCATCATTGGGCTCAAATCATCTGTTTAGGTTTGA  
TACTTAGTTGATGGATTTCTTCACGCAAGA

#### >*hipI-SODC2*

GATATTTTGATTTTAAAAACCTGAGGAGAGAGCAGAAGCAAGAGTAAGCGCAAAGATAAAATGGC  
AACAGGCTCTGTGAAAGCGGTGGCCCTCATCACCGGAGACTCCAATGTTAGAGGCTCTCTTCATT  
TCATTCAAGAACCAAACGGGGCAACACATGTGACAGGGAGGATTACTGGCTTATCTCCGGGCCTT  
CATGGCTTTCATATTCATGCTCTTGGTGCACCAATGGCTGCAATTCCTACTGGACCTCATTTC  
CAATCCATTAAAGAAGGACCATGGAGCTCCAAGTGACAACGACGTCATGCTGGAGATTTGGGGA  
ACATCACTGCAGGCTCTGATGGTGTGTCAGAGGTTTCAATCAAAGACTTGCAGATAACCACTGAGT  
GGGATGCATTCGATATTGGGGAGGGCTGTTGTTGTGCATGCTGATCCTGATGATCTTGGAAAAGG  
TGGACATGAACTTAGCAAGACAACCTGGGAATGCAGGTGCAAGGGTTGGATGTGGCATCATTGGGC  
TCAAAATCATCTGTTTAGAGTTGATACTTGCTTTGATGGGTTACTTTCATCAAGATGCCCTTCTGGT  
AAAACTGAAGCAGCGAGAAGAAGAAGACG

Supplementary Figure I (a): cDNA sequence of *hipI-SODs*

> estExt\_fgenesh4\_pg.C\_LG\_XIX0416 (*PthipI-SODCI*)

TTTTAAAAACCTGAGAGAGAGCAGCAGCAAAGATAAAAATGGCAACAGGGTCTGTGAAAGCGGTGGCTCTC  
ATCACCGGAGACTCTAATGTTAGAGGCTCTCTTCATTTTCATTCAAGAACCAAACGGTCTCTCTCTTTTTTC  
TATCTTGCTAAGAAAAGAAAGCATGGTTTTTTTTCTTGATTGTATCTGCGTGAAACATGAATGTATGTATG  
TATATCTACAGGGGCAACACATGTGACAGGGAGGATAGCTGGCTTATCACAGGCCTTCATGGGTTTCAT  
ATTCATGCTCTTGGTGATACCACCAATGGCTGCAATTCCTACTGGTATACTCTCTCTTTATACATGTGTGT  
GTTGTCGCTTCAGAGGGTAAAATGTACTGTTTCTTGCAATTCTTTTTTACGGGTTGGCTGCGGTATTTCAT  
ATGCATGACTATTTGTTACTATCTTGTTGAATTTGAACTGGGATTTTTAAAATTAGAGCAGTAGGTGCTGA  
TTTTAGGCTCGTGATGCTTATCTTCTGTGCGACTGCAAGATTATGTTCTTGGTTGTTACTGTTGGCACTTCT  
TTTCAAATTTGATTTTGAATTTAACTCTGCAACTTTGTTGTGATATTTAGGCTCACGAAGTTCTTATCT  
TTTATGTATGTGGCTTTTACTTTGGATTGCAGCAGTTTTTCATTCATGGTTATAAATTTACTAATGATCTT  
ACTTAATGTTAGGACCTCATTTCAATCCATTAAGAAGGACCATGGAGCTCCATGTGATAATGAACGTCA  
TGCTGGAGATTTGGGGAACATCATTGCAGGCTCAGATGGTATGCGCTGTTTCTTTTTCTTATATGAAT  
TGGTAAGTTGGAGAACCAGGGACTGGTTTAGCTTAATTTTTTTCATGTTGCAGGTGTTGCAGAAAGTTTCA  
TCACAGACTTTTCAGATTTTACGGATACCTATAGTGATTGGATTAATGATAGTCTCTTTTTGATTTTGAAT  
GGTTTTGTGCTTTTATTACTCTGTTCTCTGGATTAACTTAAGTTTTTCTGATAATTCATGCTAGTTTT  
GGTTTTGGCTCATGTTACATGATCTTGTGATCTTGACAATTTTAGAATTATCAAATGCCATGAGAATCTC  
AGTCTAATGGTTTTGTGCAGGGTTGCACAGCTGCCCTTGATTTCTTCAGATCTTTTTGTTTATAAAAAGTT  
TTTTACTCGGTGAATCTAGCTTCAATTATTGAACTTCTCTCTCTTGGTTTTCAACTTCTAGATACCCTGA  
GTGGGATGCATTCATATTGGGGAGGGCTGTTGTTGTGCATGCTGATCCTGATGATCTTGGAAAAGGTAA  
AGGCTTCTAGATTTGGCTGCAAAATATTTGCATGTTACCTCAGATACTATCACTAGCTTCGCAGAAAAC  
AGGTATGTGTTGGAAAACAGTGGCTATTTTTTTTTCTTATGAAGTAGGTATGAAATTTTTATTTTTGTTAT  
GGTCATAGAGATTATTTATGGGGTGGCCTGATTGTTTATAAGCATCACCTCATACTTGTAAATCAGTTTG  
CCAAAATTTAATGTTACGTGAGCTCCTGCATTCTAGCAATCATTCTGTAAGTTTTCAGGCTGCTCCTTGT  
AAAATTCGTATCTGGTATGCTTATATATGCGCTTAACTTTAGTCTGCAACTTGAGTGCCCTTAAAGTTATT  
AAGCTGATATGGACTCGCTTATATCCCCTGATTCAAACTTGCTTCACTTTTATATTTTATCTCGTGCATC  
AATCTCTGCCTGAGTTTTATTGGATTAGGAAGCCTATTGATTTCTGTTGCTGCTCGTTGCTGTCTTAAAC  
TTTTTGAATTCACATGTTTGTGTTTTGGAGGATGAGCAAGGGTGTGCACCGAATGAATATTTCTATGAAGT  
TCGGTTTTAATCATGTACATATTATCAACAGTCAGTGCCCTCAACTGTCTTTCCACATATGAAACATAGGCA  
TCATGGTCCAAGTGCTGTTTGCATTAAGCTAAATTTATCTCAAATTTCTTATAACAAGAATGATCATCTTGA  
CCTGACCTCTCCGACCCGAGCTAGTTTGAATTTGAGGCTTGGTTGTTGTTGTTGTTCTTGGCCTGACCT  
TTCCCCATCAGAATTTTGCATGGAGCAGAATAAATCTGATGATTGTGTGGTGAGAAGTTTTTAT  
AAGGAATTTAGAATGTAGAAAAAAGGTGAAAAAGTGTGATATGTAAGAATCCATCCACTATTACTCCCC  
ACTTAACCAGGGCTCGGGGAAAAAATTTTGTACATGCTCTAGAGTCTAGATTTTCTGAAGAAAATTTTGA  
AATTCACAGTTAAACAAGTCCGGATGCGTGTTCCAAAAACAGGCATTTTCATCTAGTCAAATAGTGAAGA  
AAATTTTTTATTACATGTTCTGCATGTGATAAGAGGATGGAGAAGCTTACCGTTACTGGGACATTTCTGA  
GCGCCTAGAGATTTGTGGTATATGATTTTTTGGTGTTTAACATCAACTAAATTTGGCTTTTTCTTAGTAGAA  
GAGCAACTAAATTTTTGGAGGTTACAACACAGGAAATCTGTTACCTCTTTGTTGAATGGGACTATTTGGA  
GAGTATTGCACAACAAAACCTTTGAAGAGGTTGGGATGCAATGCTGTAAACTGGAATCACATTTCTGATC  
AGTGTGTTGTTCACTGAAAGTCTATATCTCCAACATTTCTTTGATCATTTACTTATTTGGGAATCAAACA  
ATTTTCATATAGATGCCTGTTTTATTATCTGTCCGGGAATAGAAAAAATTCATGTAGATGCTCGTTTCAT  
TATCTGTACTGAAGCATTTTTTTTTTTTTCAAATTCAAAATAATGGGCAGGTGGACATGATCTTAGCAAGA  
CAACTGGGAATGCAGGTGCAAGGGTTGGATGTGGTAATATTCCCTACTCTTATGAATTTTTTTATGCTTT  
CGAGCAAGAATTTTTAGTCATGAGATGGAATGGAGTGGGTGTCACATACTACTTATTTTTTCAATTAATAAT  
CCTTTTTGCTTATATACAGAAGCCTGACATTTGTTACATTATTTTGGCAGGCATCATTGGGCTCAAATCAT  
CTGTTTAGGTTTGATACTTAGTTGATGGATTTCTTCATGCAAGATGTTCTTTCCGGTAAAGACAGAAACAA  
CTAAAAGAAGGATGTCATTGTAAGTTTTGAAGGGTGTATCCAATATACTTGTTCGAAACTGTAATCTCCTA  
ATAACAAAGTCTATGTAATATCT

> estExt\_Genewise1\_v1.C\_LG\_XIII1983 (*PthipI-SODC2*)

AAGTATAACTTTTCCTTGTTATTTTATATTTATAATAATATATATAAATGTCTTACATTTTTAAACCTGAGAAG  
CATAAGGAACAGTGGCAGCAAAGATAAAATGGCAACAGGCTCTGTGAAAGCGGTGGCTCTCATCACCGGAGA  
CTCCATTGTTAGAGGCTCTCTTCATTTTCAATCAAGAACCAAACGGTCTCTCTCACACTTTCTATCTGTATTT  
TGTTTTAGAAAAGAAAGCATGGTTCTTTTCTTGATTGTATCTGCATGAAACATGATATATGTATGTGTGTGTA  
CAGGGGCAACACATGTGACAGGGAGGATTACTGGCTTATCTCCGGGCCTTCATGGCTTTTCATATTCATGCTC  
TTGGTGACACCACCAACGGCTGCAATTCCTACTGGTACTCTCTCCTTCTGTTTAAATGTTTGTGTTGCCACTT  
GTCATTGGTTGACGTTTACCGTTTCTTAAATTCATAAGTGGGGTTTTTTGTTGGCTGGCTGCTGTATATAT  
GCACGACTATTTGTAACATCTTTGTTGAATTTGAACTGGGATTTTTAAATAGAGCAGTAGGTGCTAATTTT  
TGGATCATGATGATTATCTTTTAAAGTGGGTTATCTTCTATTGACTGCAAGATTATGTTCTTGTTGTTATTGT  
TGGCACTTCTTTTCAAATTTGAGTTTAAATTTAAAGTCTAGCGACTCCATTTTGTATTTAGG  
CTCATAAATTTCTTATCTTTTATGTACCTTATGCTTTGGATTGCTGCAGTTTTAGTCCATGGTTGTAAAATC  
GTCTTATGATCTTACTTAAATGCTAGGACCTCATTTCAATCCATTAAGAAGGACCATGGAGCTCCAAGTGA  
CAAAGAAGCTTGGAGATTTGGGGAACATCATTGAGGCTCTGATGGTATGTGCCGTTTCTTAATTTCT  
TATATGAATTTGGCAAGTTGGAGAGCCAGGGACAGATTTTAGCTTCAATTTTTTCATGCTGCAGGTGTCAG  
AGGTTTTCAATCAAAGACTTGCAGGTATTAACAAATAACTATCGTAAGGGGTTAGATGGTAGTCTCTTTTGGT  
TTAGAATTTCTTCAATTTTTCATGCTCTTGATTACCTCATTCTCTAGATGAACTTGAAAGTTTTTTCGATAAT  
TTGATGCTTGGTTTTGGTATTGGCTCGAGTTATTTGATCTTGAAATTTTTTGGAAATTATCAAATGCCATGAAG  
CTCTCAGTCAAATGGTTTTGTGCCGGGGTGCACAGATGCCCTTGGTTTTCTTCAATTTTGGTCTCAAAAAA  
AGTTCGACTCAGTGAATTTTCGCTTCAATTATTGAACGTCTCTCTCTTGGTTTTGCTTCTAGATACCCTGA  
GTGGGATGCATTGATATTGGGGAGGGCTGTTGTTGTGCATGCTGATCCTGATGATCTTGGAAAAGGTAAG  
GCTTCTAGATTTGGTTTTCAATATATTTGTGCCTTGAAAATTTCTTATCCGGTTATGCTTGTATATATGTGCT  
CAATGTTAGTAAGCAACTTGAGTGCCCTTTAGTTTTTAACTGATATAGACTAGCTTATATCTCGTGATTCA  
AACTTGCTTTCACTTCTATATGTTATTTTTGTGCGTCATTCTTTGCTTGGAGTGATGCGGGATAATAAATAATA  
AGAATTAATAAATAAAGAAAGAAACTTTTTAGATAAAGAAAAAGCTAAAAAAGAGAAGAAAGGGGATTGG  
AGCTATGCAAAGTATGCAATATTTTCAATTAATCATCAAACCTGTCTAACATTTAGAAAAGTAGGATATACTA  
AAACTCTAACTAGAATAAGCGATTGGGCTTATGGCCCGCTAAATAAAATGCCCAATAATAATTATATCAAAC  
CCAACAAATAAAACCAAATTAATAAAACTCAACTAAAAGTTCATATAAAATTAACCTAAGACATAAGCTAAAG  
CCCAATCTCTTAATGGTTTTGGGCTATCCTCCATCGTCTATGATCATACGCGTGCCTGAAACAGTGTTTTGGGT  
TCGGTGTCCCACCCTGAGTTTATTGGATTAGGTAAGGGAGCCTATTGATTTCTTGATGTTGCTTGTGCT  
TTCTTAAACTCTTCAAATCAAGTGCATGTGTTTTGGGGATGAACTAGAGTGAGCACTGAATGGGTATTCTA  
TGAAGTTCAGTTAAACATGTACATATTTTCAACTGCTCAGTGCCCTCAACAGGCTTTCTACGTAGGCAACAT  
ATGCAATCATGATCCACGAGCTGCTAAGTTTATCTCAAATCTGTTTTAGAATGATCATCTTGGCTTGTATCTT  
TCCCCATTAGAAACTTTGCATGAAGCAGAATGAACTAATATCTGTGATTGTGTGACGTGAAGTAGTTTTATA  
GGGAATTTATAAAGTAGAAGAAAGTCCAAAAGAGTGATATATAAAAAATCTGTCTTGTAATGTTCCATTTA  
ACTAGGGCTCTAGGAGACATTTTTGGGCATACTCTAGTGTCCATATTTTTAGCAAGAAATTTGTGTAATTCAC  
AGTTAAGCCACAAGTTCAGATGCATGCCTGGAACAGGCGTTTATCTAGTCAAATAGAAGAGAATTTTTGTTA  
TTTGGCTCTACATGTGATAAGAGGATGGAGGAACTCATCATTACTGGGACATTGTCTAAATGGCTGGAGATT  
TATGGTGTACTATGTCTTTGGTGTTTAACATCAACTGAATTTGAATTTGCTTAGAAGTAGAGCTACTAAATTT  
TTGGAGGCTACACTACAGGAAATCTATTACTACCTCTTTGTTGAATGGGGACTACTTGGAGAGTAGTGAACG  
ACAGAACTTTTGAATAGTTGAGATGCAATGCTGTAAACTGGAGTCATTTTCTGATTAGTTGTTTGTTCAT  
TTGGATGTATATACCTCCAACATTTCTTTTGGATCATTTTCTTATCTTGAATGAAACAATTGTATATAGAT  
GCCTGTTTTTTTTACCTGTATTGAAACATTTTCTTAGAAAATCTCAAATAATGGGCAGGTGGACATGAACT  
TAGCAAGACAACCTGGGAATGCAGGTGCAAGGGTTGGATGTGGTAATACTACTTTTCTTATACTTTTTCTGTG  
CTTTCTAACATTAACCTTTAGTGAGTAATATTCTGGGGCATGAGATGGAATGGAGTGAGTGTGTCATGTGAT  
TTATTTTTCAATTAATAATCTTTTTGCTTATACACAAAAGCCTGACATTTGTTACATTATTTGGACAGGCATC  
GTTGGGCTCAAATCATCTGTTTAGAGTTGATACTTGGTTTGGATGGGTTACTTCATCAAGATGCCCTTCTGGT  
AAAACTGAAGCAGCGAGAAGAAGAAGAACGTCCTTTAAGTTTTGCAGGCTCTCGTCCAACACACTTATGC  
GAAGTTGTAATCTCCCATTAAACAAAATAAGTGAACCTCTGAATATTCAAATTTGTCAATCTATCGCCATGGCT  
TGAAAAGCTTTACTTTT

Supplementary Figure I(b): Poplar genomic sequence for *PthipI-SODC1* and *PthipI-SODC2*. [Red- exons, black-intron, blue-UTR]
